# Supplementary material for: Regulation of photoluminescence properties of graphene quantum dots via hydrothermal treatment
Source: Royal Society of Chemistry journal article supplement (doi:10.1039/c4cp02652g), 2014-07-25
Supplement: c4cp02652g1.pdf [file c4cp02652g1.pdf]

## Supplementary Information

# Regulation of photoluminescence properties of graphene quantum dots via hydrothermal treatment

Peihui Luo,\* Yu Qiu, Xiangfeng Guan and Linqin Jiang

College of Electronics and Information Science, Fujian Jiangxia University, Fuzhou

350108, People's Republic of China

## Supplementary Figures

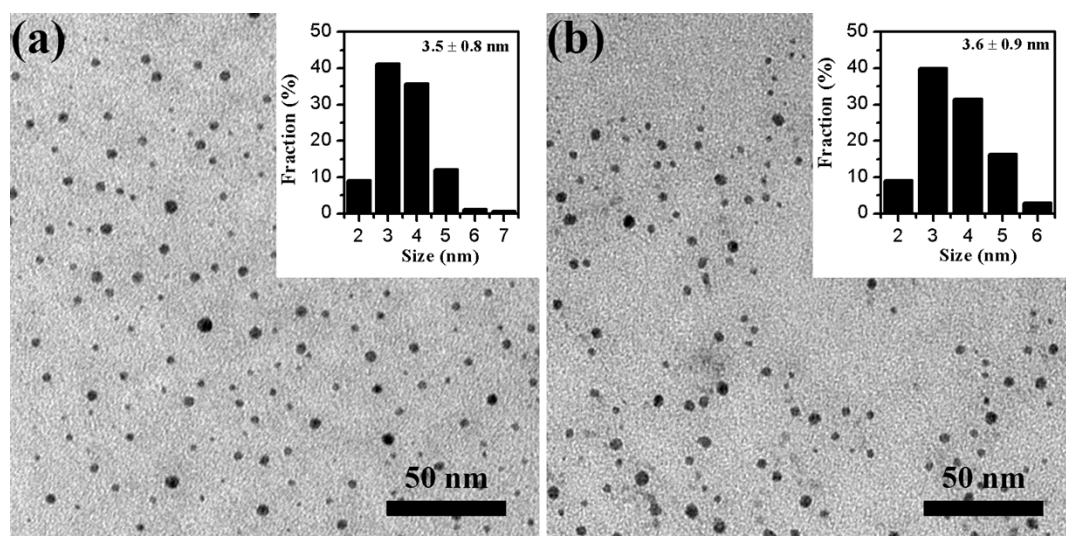

**Fig. S1** TEM images of GQDs prepared from graphite powder before (a) and after (b) hydrothermal treatment. Inset: the corresponding size distribution.

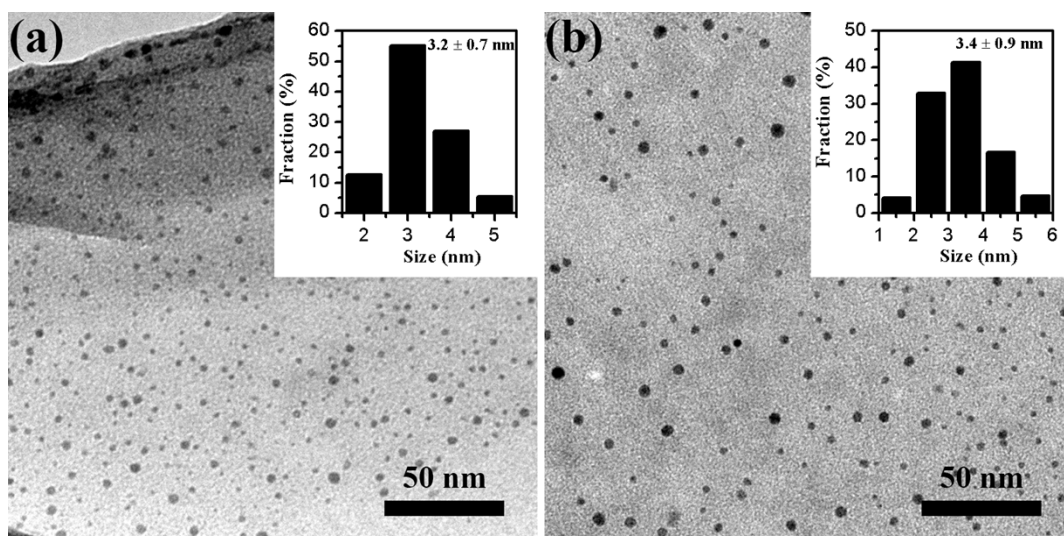

**Fig. S2** TEM images of the GQDs prepared from GO (a) and RGO (b). Inset: the corresponding size distribution.

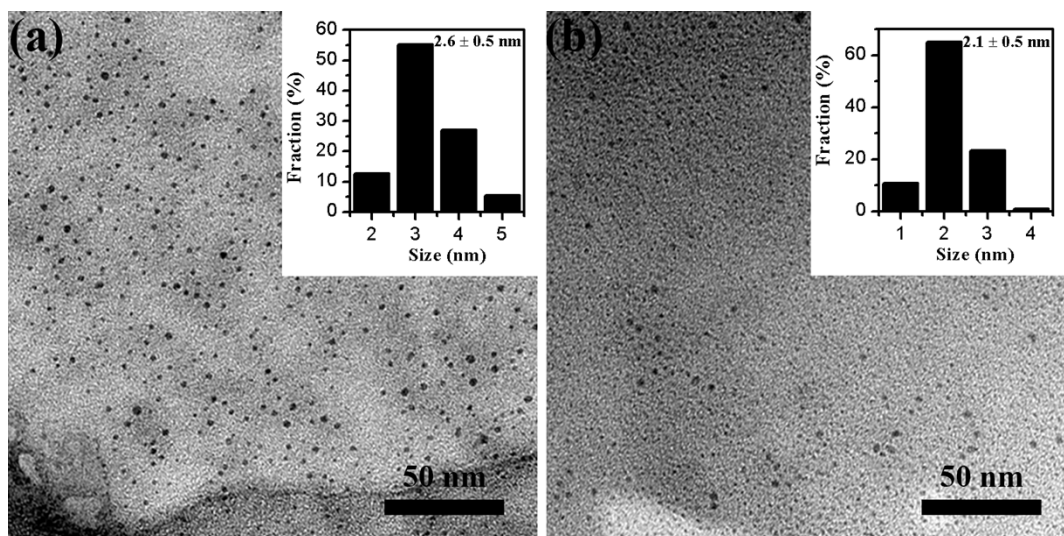

**Fig. S3** TEM images of the GQDs prepared from carbon fibers at 80 (a) and 120 °C (b). Inset: the corresponding size distribution.

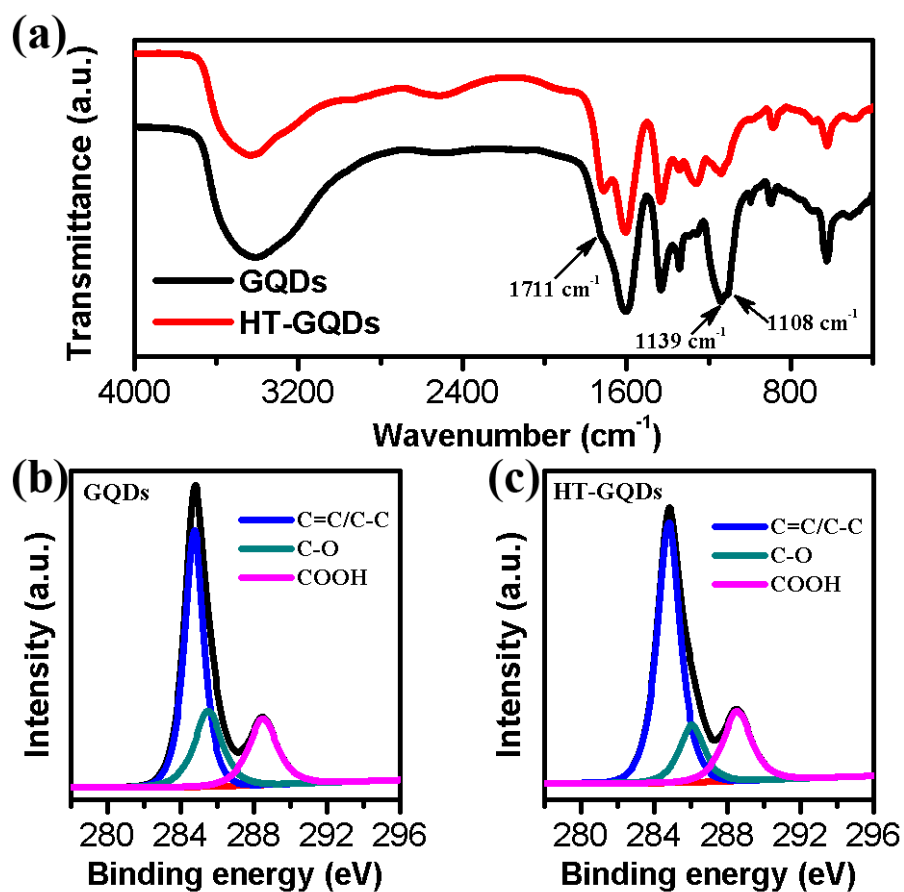

**Fig. S4** FTIR (a) and C 1s XPS spectra (b, c) of GQDs and HT-GQDs prepared from graphite powder at 100 °C.

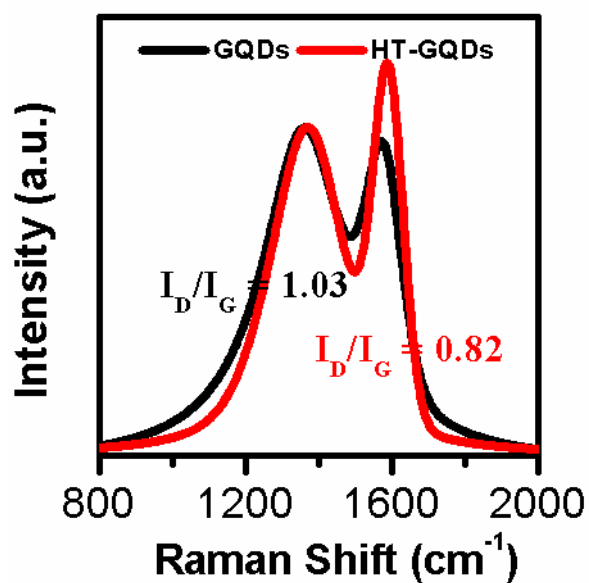

**Fig. S5** Raman spectra of GQDs and HT-GQDs prepared from graphite powder at

100 °C.

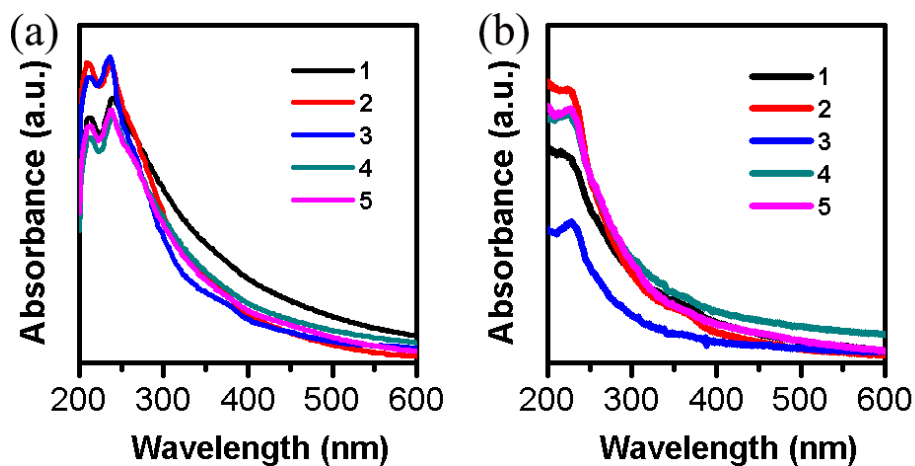

**Fig. S6** UV-visible absorption spectra of various GQDs before (a) and after (b) hydrothermal treatment. (1-5) GQDs prepared from different carbonaceous materials or at different temperatures: carbon fibers at 80 °C (1); carbon fibers at 120 °C (2); GO at 100 °C (3); RGO at 100 °C (4); graphite powder at 100 °C (5).

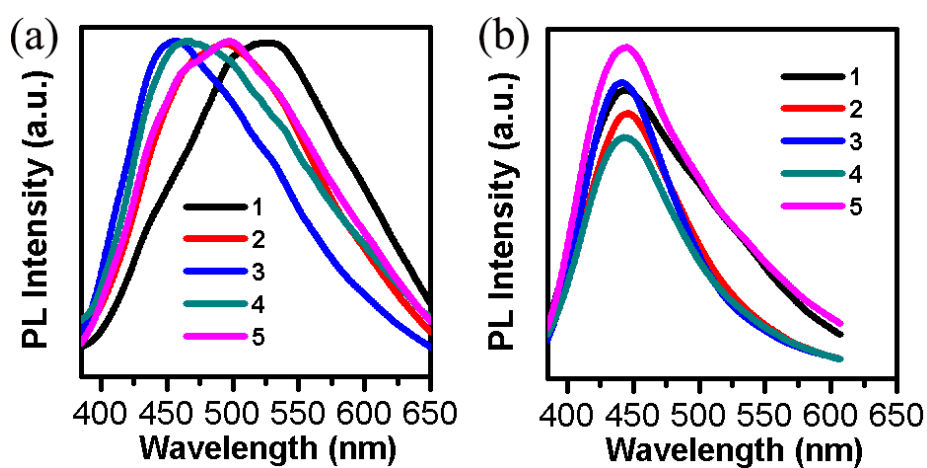

**Fig. S7** PL spectra of various GQDs before (a) and after (b) hydrothermal treatment. (1-5) GQDs prepared from different carbonaceous materials or at different

temperatures: carbon fibers at 80 °C (1); carbon fibers at 120 °C (2); GO at 100 °C (3);  
RGO at 100 °C (4); graphite powder at 100 °C (5).
